# Supplementary material for: Diagnosis of Neurological Infections in Pediatric Patients from Cell-Free DNA Specimens by Using Metagenomic Next-Generation Sequencing
Source: PubMed Central journal article supplement (PMC9927296; doi:10.1128/spectrum.02530-22), 2023-01-18
Supplement: spectrum.02530-22-s0001.pdf [file spectrum.02530-22-s0001.pdf]

## Supplementary Online Content

### Diagnosis of Neurological Infections in Pediatric Patients from Cell-Free DNA Specimens using Metagenomic Next-generation Sequencing

Xia Li<sup>1#</sup>, Le Yang<sup>1#</sup>, Dongjing Li<sup>1#</sup>, Xuying Yang<sup>2</sup>, Zhijing Wang<sup>1</sup>, Mengyi Chen<sup>1</sup>, Fang Wu<sup>1</sup>, Xiangjun Dou<sup>1</sup>, Mengmeng Niu<sup>1</sup>, HongYan Qi<sup>1</sup>, Ting Deng<sup>1</sup>, Han Xia<sup>2\*</sup>, Dong Wang<sup>1\*</sup>

<sup>1</sup>Department of Pediatric neurology, Xi'an Children's hospital, No. 69, Xijuyuan Lane, Lianhu District, Xi'an City, Shaanxi Province, China, 710003.

<sup>2</sup>Department of Scientific Affairs, Hugobiotech Co., Ltd., No.1, East Disheng Road, Beijing, China, 100176

<sup>#</sup>Xia Li, Le Yang, and Dongjing Li contributed equally to this work.

\* Correspondence: Dong Wang, [WDhope20@163.com](mailto:WDhope20@163.com); Han Xia, [xiahan@hugobiotech.com](mailto:xiahan@hugobiotech.com)

#### eMethods

**eFigure 1.** Contingency tables for the clinical diagnosis with cfDNA mNGS and conventional methods sets, respectively.

**eTable 1.** The comparison between the true positive (TP) and false negative (FP) mNGS results.

#### eReferences

This supplementary material has been provided by the authors to give readers additional information about their work.

## **eMethods**

### ***Cell-free DNA Extraction***

CSF samples were collected through centrifugation at 1600×g for 10 min, followed by centrifugation at 16,000 ×g for 10 min at 4°C. According to the manufacture's instruction for the QIAamp DNA Micro Kit (QIAGEN, Hilden, Germany), cfDNA was extracted and purified. The quality and concentration of DNA samples were monitored by a Qubit Fluorometer (Thermo Fisher Scientific, MA, USA).

### ***Whole-cell DNA Extraction***

The 124 CSF samples were homogenized using grinding instrument, TGrinder H24R (TIANGEN, Beijing, China) and centrifuged at 10,000g for 5 min. The supernatant was used for wcDNA extraction according to the manufacture's instruction for the QIAamp DNA Micro Kit (QIAGEN, Hilden, Germany). The quality and concentration of DNA samples were also monitored by a Qubit Fluorometer (Thermo Fisher Scientific, MA, USA).

### ***Metagenomic next-generation sequencing and analysis***

Metagenomics libraries were constructed by QIAseq Ultralow Input Library Kit (QIAGEN, Hilden, Germany) according to its manual. The qualified library was sequenced on Nextseq 550 platform (Illumina, San Diego, USA). In parallel with the clinical samples, positive control and negative control (non- template control, NTC) were also set for mNGS detection with the same procedure and bioinformatics analysis.

After filtering out adapter, low-quality, low-complexity, and shorter reads of <35bp(1), high-quality sequencing data were generated. Next, human reads were removed by mapping reads to human reference genome (GRCh38) using Bowtie2(2). The remaining clean data was aligned to the microbial genome database (<ftp://ftp.ncbi.nlm.nih.gov/genomes/>) using Burrow-Wheeler Aligner software(3). The reads number and reads per million (RPM) of each detected pathogen was calculated and the microbial composition was presented. The positive criteria for the mNGS result were set as follows:

- 1) For the detected bacteria (*Mycobacterium* excluded), fungi (*Cryptococcus* excluded), and parasites:
  - a) genome coverage of the unique reads mapped to this microorganism ranked top10 of the same kind of microbes and the microorganism was not detected in the NTC; or b)  $RPM_{sample}/RPM_{NTC} > 10$  ( $RPM_{NTC} \neq 0$ ).
- 2) For viruses, *M. tuberculosis*, and *Cryptococcus*:
  - a) the unique reads of this microbe was not detected in NTC but at least 1 specific read was mapped to species; or b)  $RPM_{sample}/RPM_{NTC} > 5$  ( $RPM_{NTC} \neq 0$ ).

After the prior analysis, if mNGS results were in accordance with the patient's clinical features, the detected pathogens would be considered as causative agents, or the detected organisms would be classified as non-pathogenic microbes(4).

|            |   | Conventional methods |     |
|------------|---|----------------------|-----|
|            |   | +                    | -   |
| cfDNA mNGS | + | 33                   | 212 |
|            | - | 7                    | 94  |

Sensitivity: 82.5%  
 Specificity: 30.7%  
 PPV: 13.5%  
 NPV: 93.1%

**eFigure 1.** Contingency tables for the clinical diagnosis with cfDNA mNGS and conventional methods sets, respectively

**eTable 1.** The comparison between the true positive (TP) and false negative (FN) mNGS results.

|                                                 |                                           | <b>True positive<br/>(TP)</b> | <b>False negative<br/>(FN)</b> | <b>P value</b> |
|-------------------------------------------------|-------------------------------------------|-------------------------------|--------------------------------|----------------|
| <b>Total</b><br><br>(TP, n=177; FN,<br>n=78)    | Days of onset                             | 12.3±14.9                     | 17.1±19.2                      | 0.0052         |
|                                                 | Days of mNGS detection after<br>admission | 3.6±3.9                       | 4.4±6.4                        | 0.1321         |
|                                                 | Days of antibiotic usage                  | 5.9±7.5                       | 9.1±10.5                       | 0.0232         |
| <b>Bacteria</b><br><br>(TP, n=102; FN,<br>n=29) | Days of onset                             | 10.0±10.5                     | 17.0±14.6                      | 0.0153         |
|                                                 | Days of mNGS detection after<br>admission | 3.5±3.5                       | 6.1±9.7                        | 0.0415         |
|                                                 | Days of antibiotic usage                  | 6.0±7.5                       | 13.0±13.6                      | 0.0064         |
| <b>Viruses</b><br><br>(TP, n=67; FN,<br>n=42)   | Days of onset                             | 14.3±18.8                     | 16.5±23.1                      | 0.6399         |
|                                                 | Days of mNGS detection after<br>admission | 3.6±4.0                       | 3.1±2.5                        | 0.9576         |
|                                                 | Days of antibiotic usage                  | 4.8±5.7                       | 5.4±5.4                        | 0.3508         |

## **eReference**

1. Chen Y, Feng W, Ye K, Guo L, Xia H, Guan Y, Chai L, Shi W, Zhai C, Wang J, Yan X, Wang Q, Zhang Q, Li C, Liu P, Li M. 2021. Application of Metagenomic Next-Generation Sequencing in the Diagnosis of Pulmonary Infectious Pathogens From Bronchoalveolar Lavage Samples. *Front Cell Infect Microbiol* 11:541092.
2. Langmead B, Salzberg SL. 2012. Fast gapped-read alignment with Bowtie 2. *Nat Methods* 9:357-9.
3. Li H, Durbin R. 2009. Fast and accurate short read alignment with Burrows-Wheeler transform. *Bioinformatics* 25:1754-60.
4. Zhang Y, Cui P, Zhang HC, Wu HL, Ye MZ, Zhu YM, Ai JW, Zhang WH. 2020. Clinical application and evaluation of metagenomic next-generation sequencing in suspected adult central nervous system infection. *J Transl Med* 18:199.
